# Supplementary material for: White Paper: Landscape on Technical and Conceptual Requirements and Competence Framework in Drug/Disease Modeling and Simulation
Source: PubMed Central journal article supplement — CPT Pharmacometrics Syst Pharmacol. 2013 May 1;2(5):e40–. doi: 10.1038/psp.2013.16 (PMC3674326; doi:10.1038/psp.2013.16), 2013-05-01
Supplement: psp201316x17.pdf [file psp201316x17.pdf]

## DDMoRe WP9: Training Survey

Dear Participant,

the purpose of this survey is to assist the DDMoRe WP9 team create a landscape of technical and conceptual requirements and verify priorities for training and education in Drug/Disease Modelling & Simulation (DD M&S).

Please complete this survey on an INDIVIDUAL basis (NOT on behalf of your organisation, NOR your function, NOR your peers).

The responses of completed surveys will be collated, analysed and documented in a report to share with the DDMoRe community.

Questions 1-5 are compulsory and common to all taking the survey. Your contact details will be kept confidential; they are collected to only allow WP9 to identify which functions/organisations have completed the questionnaire, and clarify any answers if required.

According to your answer in Q5 you will be prompted into one of the four different environments of the survey. Questions marked with an asterisk are compulsory fields. All questions allow multiple selections as apply.

The time needed to complete the survey is less than 10 minutes.

DDMoRe WP9 would like to thank you in advance for taking this survey!

### \*1. Please complete the following details:

Name:

Title:

Organisation:

City Town:

Country:

Email address:

### \*2. Please indicate your area within drug research & development and drug utilisation process:

**(multiple answers are possible)**

- Academic research
- Discovery
- Development (Preclinical)
- Development (Clinical)
- Therapeutic Use Optimisation
- Regulatory authorities
- No specific area
- Other (please specify)

**\*3. Therapeutic areas you are involved:**

**(multiple answers are possible)**

- Diabetes
- Oncology
- Alzheimer's
- Infectious diseases
- Safety (QTc interval, hepatotoxicity, neurotoxicity)
- Others (please specify)

**\*4. How do you collect information related to M&S:**

**(multiple answers are possible)**

- Internal research teams
- Publications
- Technical reports
- Regulatory documentation
- Other (please specify)

**\*5. What is your primary experience in Modelling & Simulation (M&S):**

**(choose ONE option)**

- Develop Models / Perform M&S activities
- Apply/Interpret published results from M&S or produce data without developing/performing M&S
- Review M&S results
- Being involved with all the above (answer the following questions based on your primary role)

## Questions for those who perform M&S activities

### 6. Which modelling & simulation applications do you use:

|                  | Never                 | Occasionally          | Frequently            |
|------------------|-----------------------|-----------------------|-----------------------|
| AcsIX            | <input type="radio"/> | <input type="radio"/> | <input type="radio"/> |
| Bio-SPIICE       | <input type="radio"/> | <input type="radio"/> | <input type="radio"/> |
| Berkeley Madonna | <input type="radio"/> | <input type="radio"/> | <input type="radio"/> |
| CellML           | <input type="radio"/> | <input type="radio"/> | <input type="radio"/> |
| JDesigner        | <input type="radio"/> | <input type="radio"/> | <input type="radio"/> |
| Matlab           | <input type="radio"/> | <input type="radio"/> | <input type="radio"/> |
| Medici           | <input type="radio"/> | <input type="radio"/> | <input type="radio"/> |
| Monolix          | <input type="radio"/> | <input type="radio"/> | <input type="radio"/> |
| NONMEM           | <input type="radio"/> | <input type="radio"/> | <input type="radio"/> |
| OpenBUGS         | <input type="radio"/> | <input type="radio"/> | <input type="radio"/> |
| PK-Sim/MoBi      | <input type="radio"/> | <input type="radio"/> | <input type="radio"/> |
| PopED            | <input type="radio"/> | <input type="radio"/> | <input type="radio"/> |
| PsN              | <input type="radio"/> | <input type="radio"/> | <input type="radio"/> |
| R                | <input type="radio"/> | <input type="radio"/> | <input type="radio"/> |
| SBML             | <input type="radio"/> | <input type="radio"/> | <input type="radio"/> |
| SBTOOLBOX        | <input type="radio"/> | <input type="radio"/> | <input type="radio"/> |
| SPlus            | <input type="radio"/> | <input type="radio"/> | <input type="radio"/> |
| Stata            | <input type="radio"/> | <input type="radio"/> | <input type="radio"/> |
| WinBUGS          | <input type="radio"/> | <input type="radio"/> | <input type="radio"/> |
| WinNonlin        | <input type="radio"/> | <input type="radio"/> | <input type="radio"/> |
| Other            | <input type="radio"/> | <input type="radio"/> | <input type="radio"/> |

Other (please specify)

**7. Your modelling & simulation activities. Please select as appropriate:**

|                           | Never                 | Occasionally          | Frequently            |
|---------------------------|-----------------------|-----------------------|-----------------------|
| Population analysis       | <input type="radio"/> | <input type="radio"/> | <input type="radio"/> |
| Methodology development   | <input type="radio"/> | <input type="radio"/> | <input type="radio"/> |
| Methodology evaluation    | <input type="radio"/> | <input type="radio"/> | <input type="radio"/> |
| Drug model development    | <input type="radio"/> | <input type="radio"/> | <input type="radio"/> |
| Disease model development | <input type="radio"/> | <input type="radio"/> | <input type="radio"/> |
| Optimal design            | <input type="radio"/> | <input type="radio"/> | <input type="radio"/> |
| Clinical trial simulation | <input type="radio"/> | <input type="radio"/> | <input type="radio"/> |
| Systems Biology           | <input type="radio"/> | <input type="radio"/> | <input type="radio"/> |
| Other                     | <input type="radio"/> | <input type="radio"/> | <input type="radio"/> |

Other (please specify)

## 8. What was the nature of the models you have developed:

(multiple answers are possible)

- Efficacy
- Toxicity
- No drug
- Single drug
- Combination
- Linear
- Nonlinear
- Mixed-effect
- Classical regression
- Naïve pool approach
- ODE
- Analytical solutions
- Presence of covariates
- Mechanistic
- Empirical
- PK
- PBPK
- PBPKPD
- Disease progression
- Preclinical
- Clinical
- Systems biology
- In vitro
- Continuous
- Non-continuous
- Categorical
- Time to event
- Other (please specify)

### 9. For data-driven modelling, which estimation methods do you use:

|                      | Never                 | Occasionally          | Frequently            |
|----------------------|-----------------------|-----------------------|-----------------------|
| Linear regression    | <input type="radio"/> | <input type="radio"/> | <input type="radio"/> |
| NonLinear regression | <input type="radio"/> | <input type="radio"/> | <input type="radio"/> |
| Two-stage approach   | <input type="radio"/> | <input type="radio"/> | <input type="radio"/> |
| FO                   | <input type="radio"/> | <input type="radio"/> | <input type="radio"/> |
| FOCE                 | <input type="radio"/> | <input type="radio"/> | <input type="radio"/> |
| LAPLACE              | <input type="radio"/> | <input type="radio"/> | <input type="radio"/> |
| SAEM                 | <input type="radio"/> | <input type="radio"/> | <input type="radio"/> |
| BAYES                | <input type="radio"/> | <input type="radio"/> | <input type="radio"/> |
| Non-parametric       | <input type="radio"/> | <input type="radio"/> | <input type="radio"/> |
| Other                | <input type="radio"/> | <input type="radio"/> | <input type="radio"/> |

Other (please specify)

### 10. How do you communicate your results: (multiple answers are possible)

- Power Point Presentation
- Manuscript/Publication
- Technical Report
- Other (please specify)

### 11. Which are the gaps you have identified while performing M&S (in the current modelling setting):

|                                                          | None                  | Minor                 | Major                 |
|----------------------------------------------------------|-----------------------|-----------------------|-----------------------|
| Lack of common modelling & simulation applications/tools | <input type="radio"/> | <input type="radio"/> | <input type="radio"/> |
| Too little high-performance computing capacities         | <input type="radio"/> | <input type="radio"/> | <input type="radio"/> |
| Lack of available resources                              | <input type="radio"/> | <input type="radio"/> | <input type="radio"/> |
| Lack of sufficient education                             | <input type="radio"/> | <input type="radio"/> | <input type="radio"/> |
| Lack of sufficient training                              | <input type="radio"/> | <input type="radio"/> | <input type="radio"/> |
| Lack of suitable modelling tools                         | <input type="radio"/> | <input type="radio"/> | <input type="radio"/> |
| Other                                                    | <input type="radio"/> | <input type="radio"/> | <input type="radio"/> |

Other (please specify)

**12. Which are the major challenges you have faced (as a modeller/Systems biologist):**

|                                                   | None                  | Minor                 | Major                 |
|---------------------------------------------------|-----------------------|-----------------------|-----------------------|
| Complex mathematical functions                    | <input type="radio"/> | <input type="radio"/> | <input type="radio"/> |
| Hard to understand the model's assumptions        | <input type="radio"/> | <input type="radio"/> | <input type="radio"/> |
| Hard to understand the estimation method          | <input type="radio"/> | <input type="radio"/> | <input type="radio"/> |
| Hard to understand the ODE solvers and optimisers | <input type="radio"/> | <input type="radio"/> | <input type="radio"/> |
| Unable to produce my own scripts                  | <input type="radio"/> | <input type="radio"/> | <input type="radio"/> |
| Other                                             | <input type="radio"/> | <input type="radio"/> | <input type="radio"/> |

Other (please specify)

**13. How did you deal with those challenges:  
(multiple answers are possible)**

- I proceeded without fully understanding some concepts
- I ignored some of the model's assumptions
- I asked someone else to help me
- I took some training
- I developed a model with limitations which I further listed
- Other (please specify)

**14. Would you attend training in other M&S activities than you have used:**

- Yes
- No

**15. If Yes: which are these M&S activities:**

**16. Indicate the types of models/methods/other areas where training would assist you meeting those challenges:**

**17. Which are the areas of impact of M&S in your organisation/projects/collaborations:**

|                                                 | Never                 | Occasionally          | Frequently            |
|-------------------------------------------------|-----------------------|-----------------------|-----------------------|
| Understand drug characteristics                 | <input type="radio"/> | <input type="radio"/> | <input type="radio"/> |
| Understand disease characteristics              | <input type="radio"/> | <input type="radio"/> | <input type="radio"/> |
| Understand system characteristics               | <input type="radio"/> | <input type="radio"/> | <input type="radio"/> |
| Dose selection                                  | <input type="radio"/> | <input type="radio"/> | <input type="radio"/> |
| Decision making                                 | <input type="radio"/> | <input type="radio"/> | <input type="radio"/> |
| Methodological aspects                          | <input type="radio"/> | <input type="radio"/> | <input type="radio"/> |
| Approval of new drugs                           | <input type="radio"/> | <input type="radio"/> | <input type="radio"/> |
| New trial designs                               | <input type="radio"/> | <input type="radio"/> | <input type="radio"/> |
| (New) treatment adjustments for patients        | <input type="radio"/> | <input type="radio"/> | <input type="radio"/> |
| Hypothesis generation                           | <input type="radio"/> | <input type="radio"/> | <input type="radio"/> |
| Individualisation therapy/Personalised medicine | <input type="radio"/> | <input type="radio"/> | <input type="radio"/> |
| Translational modelling                         | <input type="radio"/> | <input type="radio"/> | <input type="radio"/> |
| Line extension modelling                        | <input type="radio"/> | <input type="radio"/> | <input type="radio"/> |
| Other                                           | <input type="radio"/> | <input type="radio"/> | <input type="radio"/> |

Other (please specify)

**18. What is the benefit of modelling & simulation activities in your organisation/projects/collaborations:**

**\*19. For training & education purposes are you willing to share published data:**

- Yes
- No

**\*20. For training & education purposes are you willing to share unpublished data:**

- Yes
- No

**\*21. For training & education purposes are you willing to share published models:**

- Yes
- No



**\*22. For training & education purposes are you willing to share unpublished models:**

Yes

No

**\*23. If you have answered YES to one of the above questions, under what conditions would you be willing to consider sharing data/models**

**\*24. Regarding M&S activities, do you collaborate with other stakeholders / organisations / partners (please include the three most important collaborations you have on a regular basis):**

Academic groups

Clinicians/Clinical Pharmacists

Pharmaceutical industry

CROs

Other non-profit research organisations

Regulatory agencies

Patient organisations

Other (please specify)

## Questions for those who apply/interpret M&S results

### 25. What type of models have you used or been involved with:

|                                                     | Never                 | Occasionally          | Frequently            |
|-----------------------------------------------------|-----------------------|-----------------------|-----------------------|
| Population (developed in NONMEM)                    | <input type="radio"/> | <input type="radio"/> | <input type="radio"/> |
| Population (developed in WinBUGS/Bayesian analysis) | <input type="radio"/> | <input type="radio"/> | <input type="radio"/> |
| Optimal dosing                                      | <input type="radio"/> | <input type="radio"/> | <input type="radio"/> |
| Other                                               | <input type="radio"/> | <input type="radio"/> | <input type="radio"/> |

Other (please specify)

### 26. What is your primary application of Modelling & Simulation (M&S):

(multiple answers are possible)

- Clinical trial design
- Evaluation of safety
- Evaluation of efficacy
- Risk benefit ratio
- Therapeutic drug monitoring
- Dose selection/adjustment
- Other (please specify)

**27. Select models from which you have applied/interpreted results:**

**(multiple answers are possible)**

- Efficacy
- Toxicity
- No drug
- Single drug
- Combination
- Linear
- Nonlinear
- Mixed-effect
- Classical regression
- Naïve pool approach
- ODE
- Analytical solutions
- Presence of covariates
- Mechanistic
- Empirical
- PK
- PBPK
- PBPKPD
- Disease progression
- Preclinical
- Clinical
- Systems biology
- In vitro
- Continuous
- Non-continuous
- Categorical
- Time to event

Other (please specify)

## 28. How do you communicate your results:

(multiple answers are possible)

- Power Point Presentation
- Manuscript/Publication
- Technical Report
- Other (please specify)

## 29. Which are the gaps you have identified while applying/interpreting M&S results to your area of interest:

|                                                          | None                  | Minor                 | Major                 |
|----------------------------------------------------------|-----------------------|-----------------------|-----------------------|
| Lack of clarity on models' assumptions                   | <input type="radio"/> | <input type="radio"/> | <input type="radio"/> |
| Lack of understanding of PKPD/statistical concepts       | <input type="radio"/> | <input type="radio"/> | <input type="radio"/> |
| Lack of sufficient education/training                    | <input type="radio"/> | <input type="radio"/> | <input type="radio"/> |
| Lack of alternative models and results to explore        | <input type="radio"/> | <input type="radio"/> | <input type="radio"/> |
| Missing parameters                                       | <input type="radio"/> | <input type="radio"/> | <input type="radio"/> |
| Missing parameters' uncertainty                          | <input type="radio"/> | <input type="radio"/> | <input type="radio"/> |
| Poor description of models' parameters                   | <input type="radio"/> | <input type="radio"/> | <input type="radio"/> |
| Difficulties to reproduce the results obtained by others | <input type="radio"/> | <input type="radio"/> | <input type="radio"/> |
| Other                                                    | <input type="radio"/> | <input type="radio"/> | <input type="radio"/> |

Other (please specify)

## 30. Which are the major challenges you have faced when applying/interpreting M&S results:

|                                                           | None                  | Minor                 | Major                 |
|-----------------------------------------------------------|-----------------------|-----------------------|-----------------------|
| Limitations of the model                                  | <input type="radio"/> | <input type="radio"/> | <input type="radio"/> |
| Hard to understand the model's assumptions                | <input type="radio"/> | <input type="radio"/> | <input type="radio"/> |
| Hard to understand the estimation method                  | <input type="radio"/> | <input type="radio"/> | <input type="radio"/> |
| Difficulties in communicating the rationale of my methods | <input type="radio"/> | <input type="radio"/> | <input type="radio"/> |
| Lack of trained staff                                     | <input type="radio"/> | <input type="radio"/> | <input type="radio"/> |
| Other                                                     | <input type="radio"/> | <input type="radio"/> | <input type="radio"/> |

Other (please specify)

**31. How did you deal with those challenges:  
(multiple answers are possible)**

- I proceeded without fully understanding some concepts
- I ignored some of the model's assumptions
- I asked someone else to help me
- I took some training
- Other (please specify)

**32. Would you attend training in other M&S activities than you have used:**

- Yes
- No

**33. If Yes: which are these M&S activities:**

**34. Indicate the types of models/methods/other areas where training would assist you meeting those challenges:**

**35. How does M&S assist you in your daily activities:**

|                                                 | Never                 | Occasionally          | Frequently            |
|-------------------------------------------------|-----------------------|-----------------------|-----------------------|
| Understand drug characteristics                 | <input type="radio"/> | <input type="radio"/> | <input type="radio"/> |
| Understand disease characteristics              | <input type="radio"/> | <input type="radio"/> | <input type="radio"/> |
| Understand system characteristics               | <input type="radio"/> | <input type="radio"/> | <input type="radio"/> |
| Dose selection                                  | <input type="radio"/> | <input type="radio"/> | <input type="radio"/> |
| Decision making                                 | <input type="radio"/> | <input type="radio"/> | <input type="radio"/> |
| Approval of new drugs                           | <input type="radio"/> | <input type="radio"/> | <input type="radio"/> |
| New trial designs                               | <input type="radio"/> | <input type="radio"/> | <input type="radio"/> |
| (New) treatment adjustments for patients        | <input type="radio"/> | <input type="radio"/> | <input type="radio"/> |
| Hypothesis generation                           | <input type="radio"/> | <input type="radio"/> | <input type="radio"/> |
| Individualisation therapy/Personalised medicine | <input type="radio"/> | <input type="radio"/> | <input type="radio"/> |
| Translational modelling                         | <input type="radio"/> | <input type="radio"/> | <input type="radio"/> |
| Line extension modelling                        | <input type="radio"/> | <input type="radio"/> | <input type="radio"/> |
| Other                                           | <input type="radio"/> | <input type="radio"/> | <input type="radio"/> |

Other (please specify)

**\*36. For training & education purposes are you willing to share published data:**

- Yes
- No

**\*37. For training & education purposes are you willing to share unpublished data:**

- Yes
- No

**\*38. For training & education purposes are you willing to share published models:**

- Yes
- No

**\*39. For training & education purposes are you willing to share unpublished models:**

- Yes
- No

**\*40. If you have answered YES to one of the above questions, under what conditions would you be willing to consider sharing data/models**

**\*41. Regarding M&S activities, do you collaborate with other stakeholders / organisations / partners (please include the three most important collaborations you have on a regular basis):**

- Academic groups
- Clinicians/Clinical Pharmacists
- Pharmaceutical industry
- CROs
- Other non-profit research organisations
- Regulatory agencies
- Patient organisations
- Other (please specify)

## Questions for those who review M&S reports

### 42. Which modelling & simulation applications have you reviewed:

|                  | Never                 | Occasionally          | Frequently            |
|------------------|-----------------------|-----------------------|-----------------------|
| AcsIX            | <input type="radio"/> | <input type="radio"/> | <input type="radio"/> |
| Bio-SPIICE       | <input type="radio"/> | <input type="radio"/> | <input type="radio"/> |
| Berkeley Madonna | <input type="radio"/> | <input type="radio"/> | <input type="radio"/> |
| CellML           | <input type="radio"/> | <input type="radio"/> | <input type="radio"/> |
| JDesigner        | <input type="radio"/> | <input type="radio"/> | <input type="radio"/> |
| Matlab           | <input type="radio"/> | <input type="radio"/> | <input type="radio"/> |
| Medici           | <input type="radio"/> | <input type="radio"/> | <input type="radio"/> |
| Monolix          | <input type="radio"/> | <input type="radio"/> | <input type="radio"/> |
| NONMEM           | <input type="radio"/> | <input type="radio"/> | <input type="radio"/> |
| OpenBUGS         | <input type="radio"/> | <input type="radio"/> | <input type="radio"/> |
| PK-Sim/MoBi      | <input type="radio"/> | <input type="radio"/> | <input type="radio"/> |
| PopED            | <input type="radio"/> | <input type="radio"/> | <input type="radio"/> |
| PsN              | <input type="radio"/> | <input type="radio"/> | <input type="radio"/> |
| R                | <input type="radio"/> | <input type="radio"/> | <input type="radio"/> |
| SBML             | <input type="radio"/> | <input type="radio"/> | <input type="radio"/> |
| SBTOOLBOX        | <input type="radio"/> | <input type="radio"/> | <input type="radio"/> |
| SPlus            | <input type="radio"/> | <input type="radio"/> | <input type="radio"/> |
| Stata            | <input type="radio"/> | <input type="radio"/> | <input type="radio"/> |
| WinBUGS          | <input type="radio"/> | <input type="radio"/> | <input type="radio"/> |
| WinNonlin        | <input type="radio"/> | <input type="radio"/> | <input type="radio"/> |
| Other            | <input type="radio"/> | <input type="radio"/> | <input type="radio"/> |

Other (please specify)



**43. The modelling & simulation activities you have reviewed. Please select as appropriate:**

|                           | Never                 | Occasionally          | Frequently            |
|---------------------------|-----------------------|-----------------------|-----------------------|
| Population analysis       | <input type="radio"/> | <input type="radio"/> | <input type="radio"/> |
| Methodology development   | <input type="radio"/> | <input type="radio"/> | <input type="radio"/> |
| Methodology evaluation    | <input type="radio"/> | <input type="radio"/> | <input type="radio"/> |
| Drug model development    | <input type="radio"/> | <input type="radio"/> | <input type="radio"/> |
| Disease model development | <input type="radio"/> | <input type="radio"/> | <input type="radio"/> |
| Optimal design            | <input type="radio"/> | <input type="radio"/> | <input type="radio"/> |
| Clinical trial simulation | <input type="radio"/> | <input type="radio"/> | <input type="radio"/> |
| Systems Biology           | <input type="radio"/> | <input type="radio"/> | <input type="radio"/> |
| Other                     | <input type="radio"/> | <input type="radio"/> | <input type="radio"/> |

Other (please specify)

**44. What was the nature of the models you have reviewed:**

**(multiple answers are possible)**

- Efficacy
- Toxicity
- No drug
- Single drug
- Combination
- Linear
- Nonlinear
- Mixed-effect
- Classical regression
- Naïve pool approach
- ODE
- Analytical solutions
- Presence of covariates
- Mechanistic
- Empirical
- PK
- PBPK
- PBPKPD
- Disease progression
- Preclinical
- Clinical
- Systems biology
- In vitro
- Continuous
- Non-continuous
- Categorical
- Time to event
- Other (please specify)

**45. For data-driven modelling, which estimation methods were included in the report:**

|                      | Never                 | Occasionally          | Frequently            |
|----------------------|-----------------------|-----------------------|-----------------------|
| Linear regression    | <input type="radio"/> | <input type="radio"/> | <input type="radio"/> |
| NonLinear regression | <input type="radio"/> | <input type="radio"/> | <input type="radio"/> |
| Two-stage approach   | <input type="radio"/> | <input type="radio"/> | <input type="radio"/> |
| FO                   | <input type="radio"/> | <input type="radio"/> | <input type="radio"/> |
| FOCE                 | <input type="radio"/> | <input type="radio"/> | <input type="radio"/> |
| LAPLACE              | <input type="radio"/> | <input type="radio"/> | <input type="radio"/> |
| SAEM                 | <input type="radio"/> | <input type="radio"/> | <input type="radio"/> |
| BAYES                | <input type="radio"/> | <input type="radio"/> | <input type="radio"/> |
| Non-parametric       | <input type="radio"/> | <input type="radio"/> | <input type="radio"/> |
| Other                | <input type="radio"/> | <input type="radio"/> | <input type="radio"/> |

Other (please specify)

**46. How do you communicate your results:**

**(multiple answers are possible)**

- Power Point Presentation
- Manuscript/Publication
- Technical Report
- Other (please specify)

**47. Which are the gaps you have identified while reviewing M&S (in the current modelling setting):**

|                                                          | None                  | Minor                 | Major                 |
|----------------------------------------------------------|-----------------------|-----------------------|-----------------------|
| Lack of common modelling & simulation applications/tools | <input type="radio"/> | <input type="radio"/> | <input type="radio"/> |
| Too little high-performance computing capacities         | <input type="radio"/> | <input type="radio"/> | <input type="radio"/> |
| Lack of available resources                              | <input type="radio"/> | <input type="radio"/> | <input type="radio"/> |
| Lack of sufficient education                             | <input type="radio"/> | <input type="radio"/> | <input type="radio"/> |
| Lack of sufficient training                              | <input type="radio"/> | <input type="radio"/> | <input type="radio"/> |
| Lack of suitable modelling tools                         | <input type="radio"/> | <input type="radio"/> | <input type="radio"/> |
| Other                                                    | <input type="radio"/> | <input type="radio"/> | <input type="radio"/> |

Other (please specify)

**48. Which are the major challenges you have faced (as a reviewer):**

|                                            | None                  | Minor                 | Major                 |
|--------------------------------------------|-----------------------|-----------------------|-----------------------|
| Complex mathematical functions             | <input type="radio"/> | <input type="radio"/> | <input type="radio"/> |
| Hard to understand the model's assumptions | <input type="radio"/> | <input type="radio"/> | <input type="radio"/> |
| Hard to understand the estimation method   | <input type="radio"/> | <input type="radio"/> | <input type="radio"/> |
| Other                                      | <input type="radio"/> | <input type="radio"/> | <input type="radio"/> |

Other (please specify)

**49. How did you deal with those challenges:  
(multiple answers are possible)**

- I proceeded without fully understanding some concepts
- I ignored some of the model's assumptions
- I asked someone else to help me
- I took some training
- Other (please specify)

**50. Would you attend training in other M&S activities than you have used:**

- Yes
- No

**51. If Yes: which are these M&S activities:**

**52. Indicate the types of models/methods/other areas where training would assist you meeting those challenges:**

**53. Which are the areas of impact of M&S in your organisation/projects/collaborations:**

|                                                 | Never                 | Occasionally          | Frequently            |
|-------------------------------------------------|-----------------------|-----------------------|-----------------------|
| Understand drug characteristics                 | <input type="radio"/> | <input type="radio"/> | <input type="radio"/> |
| Understand disease characteristics              | <input type="radio"/> | <input type="radio"/> | <input type="radio"/> |
| Understand system characteristics               | <input type="radio"/> | <input type="radio"/> | <input type="radio"/> |
| Dose selection                                  | <input type="radio"/> | <input type="radio"/> | <input type="radio"/> |
| Decision making                                 | <input type="radio"/> | <input type="radio"/> | <input type="radio"/> |
| Methodological aspects                          | <input type="radio"/> | <input type="radio"/> | <input type="radio"/> |
| Approval of new drugs                           | <input type="radio"/> | <input type="radio"/> | <input type="radio"/> |
| New trial designs                               | <input type="radio"/> | <input type="radio"/> | <input type="radio"/> |
| (New) treatment adjustments for patients        | <input type="radio"/> | <input type="radio"/> | <input type="radio"/> |
| Hypothesis generation                           | <input type="radio"/> | <input type="radio"/> | <input type="radio"/> |
| Individualisation therapy/Personalised medicine | <input type="radio"/> | <input type="radio"/> | <input type="radio"/> |
| Translational modelling                         | <input type="radio"/> | <input type="radio"/> | <input type="radio"/> |
| Line extension modelling                        | <input type="radio"/> | <input type="radio"/> | <input type="radio"/> |
| Other                                           | <input type="radio"/> | <input type="radio"/> | <input type="radio"/> |

Other (please specify)

**54. What is the benefit of modelling and simulation activities in your organisation/projects/collaborations:**

**\*55. For training & education purposes are you willing to share published data:**

- Yes
- No

**\*56. For training & education purposes are you willing to share unpublished data:**

- Yes
- No

**\*57. For training & education purposes are you willing to share published models:**

- Yes
- No

**\*58. For training & education purposes are you willing to share unpublished models:**

Yes

No

**\*59. If you have answered YES to one of the above questions, under what conditions would you be willing to consider sharing data/models**

**\*60. Regarding M&S activities, do you collaborate with other stakeholders / organisations / partners (please include the three most important collaborations you have on a regular basis):**

Academic groups

Clinicians/Clinical Pharmacists

Pharmaceutical industry

CROs

Other non-profit research organisations

Regulatory agencies

Patient organisations

Other (please specify)

## Questions for those who perform M&S, apply/interpret M&S results an...

### 61. Which modelling & simulation applications do you use/you have reviewed:

|                  | Never                 | Occasionally          | Frequently            |
|------------------|-----------------------|-----------------------|-----------------------|
| AcsIX            | <input type="radio"/> | <input type="radio"/> | <input type="radio"/> |
| Bio-SPIICE       | <input type="radio"/> | <input type="radio"/> | <input type="radio"/> |
| Berkeley Madonna | <input type="radio"/> | <input type="radio"/> | <input type="radio"/> |
| CellML           | <input type="radio"/> | <input type="radio"/> | <input type="radio"/> |
| JDesigner        | <input type="radio"/> | <input type="radio"/> | <input type="radio"/> |
| Matlab           | <input type="radio"/> | <input type="radio"/> | <input type="radio"/> |
| Medici           | <input type="radio"/> | <input type="radio"/> | <input type="radio"/> |
| Monolix          | <input type="radio"/> | <input type="radio"/> | <input type="radio"/> |
| NONMEM           | <input type="radio"/> | <input type="radio"/> | <input type="radio"/> |
| OpenBUGS         | <input type="radio"/> | <input type="radio"/> | <input type="radio"/> |
| PK-Sim/MoBi      | <input type="radio"/> | <input type="radio"/> | <input type="radio"/> |
| PopED            | <input type="radio"/> | <input type="radio"/> | <input type="radio"/> |
| PsN              | <input type="radio"/> | <input type="radio"/> | <input type="radio"/> |
| R                | <input type="radio"/> | <input type="radio"/> | <input type="radio"/> |
| SBML             | <input type="radio"/> | <input type="radio"/> | <input type="radio"/> |
| SBTOOLBOX        | <input type="radio"/> | <input type="radio"/> | <input type="radio"/> |
| SPlus            | <input type="radio"/> | <input type="radio"/> | <input type="radio"/> |
| Stata            | <input type="radio"/> | <input type="radio"/> | <input type="radio"/> |
| WinBUGS          | <input type="radio"/> | <input type="radio"/> | <input type="radio"/> |
| WinNonlin        | <input type="radio"/> | <input type="radio"/> | <input type="radio"/> |
| Other            | <input type="radio"/> | <input type="radio"/> | <input type="radio"/> |

Other (please specify)

## 62. Your modelling & simulation activities. Please select as appropriate:

|                           | Never                 | Occasionally          | Frequently            |
|---------------------------|-----------------------|-----------------------|-----------------------|
| Population analysis       | <input type="radio"/> | <input type="radio"/> | <input type="radio"/> |
| Methodology development   | <input type="radio"/> | <input type="radio"/> | <input type="radio"/> |
| Methodology evaluation    | <input type="radio"/> | <input type="radio"/> | <input type="radio"/> |
| Drug model development    | <input type="radio"/> | <input type="radio"/> | <input type="radio"/> |
| Disease model development | <input type="radio"/> | <input type="radio"/> | <input type="radio"/> |
| Optimal design            | <input type="radio"/> | <input type="radio"/> | <input type="radio"/> |
| Clinical trial simulation | <input type="radio"/> | <input type="radio"/> | <input type="radio"/> |
| Systems Biology           | <input type="radio"/> | <input type="radio"/> | <input type="radio"/> |
| Other                     | <input type="radio"/> | <input type="radio"/> | <input type="radio"/> |

Other (please specify)

## 63. What type of models have you used or been involved with:

|                                                     | Never                 | Occasionally          | Frequently            |
|-----------------------------------------------------|-----------------------|-----------------------|-----------------------|
| Population (developed in NONMEM)                    | <input type="radio"/> | <input type="radio"/> | <input type="radio"/> |
| Population (developed in WinBUGS/Bayesian analysis) | <input type="radio"/> | <input type="radio"/> | <input type="radio"/> |
| Optimal dosing                                      | <input type="radio"/> | <input type="radio"/> | <input type="radio"/> |
| Other                                               | <input type="radio"/> | <input type="radio"/> | <input type="radio"/> |

Other (please specify)

## 64. What is your primary application of Modelling & Simulation (M&S): (multiple answers are possible)

- Clinical trial design
- Evaluation of safety
- Evaluation of efficacy
- Risk benefit ratio
- Therapeutic drug monitoring
- Dose selection/adjustment
- Other (please specify)



**65. What was the nature of the models you have developed/applied/reviewed:  
(multiple answers are possible)**

- Efficacy
- Toxicity
- No drug
- Single drug
- Combination
- Linear
- Nonlinear
- Mixed-effect
- Classical regression
- Naïve pool approach
- ODE
- Analytical solutions
- Presence of covariates
- Mechanistic
- Empirical
- PK
- PBPK
- PBPKPD
- Disease progression
- Preclinical
- Clinical
- Systems biology
- In vitro
- Continuous
- Non-continuous
- Categorical
- Time to event
- Other (please specify)

**66. For data-driven modelling, which estimation methods do you use:**

|                      | Never                 | Occasionally          | Frequently            |
|----------------------|-----------------------|-----------------------|-----------------------|
| Linear regression    | <input type="radio"/> | <input type="radio"/> | <input type="radio"/> |
| NonLinear regression | <input type="radio"/> | <input type="radio"/> | <input type="radio"/> |
| Two-stage approach   | <input type="radio"/> | <input type="radio"/> | <input type="radio"/> |
| FO                   | <input type="radio"/> | <input type="radio"/> | <input type="radio"/> |
| FOCE                 | <input type="radio"/> | <input type="radio"/> | <input type="radio"/> |
| LAPLACE              | <input type="radio"/> | <input type="radio"/> | <input type="radio"/> |
| SAEM                 | <input type="radio"/> | <input type="radio"/> | <input type="radio"/> |
| BAYES                | <input type="radio"/> | <input type="radio"/> | <input type="radio"/> |
| Non-parametric       | <input type="radio"/> | <input type="radio"/> | <input type="radio"/> |
| Other                | <input type="radio"/> | <input type="radio"/> | <input type="radio"/> |

Other (please specify)

**67. How do you communicate your results:**

**(multiple answers are possible)**

- Power Point Presentation
- Manuscript/Publication
- Technical Report
- Other (please specify)

**68. Which are the gaps you have identified while performing/applying/reviewing M&S (in the current modelling setting):**

|                                                          | None                  | Minor                 | Major                 |
|----------------------------------------------------------|-----------------------|-----------------------|-----------------------|
| Lack of common modelling & simulation applications/tools | <input type="radio"/> | <input type="radio"/> | <input type="radio"/> |
| Lack of clarity on models' assumptions                   | <input type="radio"/> | <input type="radio"/> | <input type="radio"/> |
| Lack of understanding of PKPD/statistical concepts       | <input type="radio"/> | <input type="radio"/> | <input type="radio"/> |
| Too little high-performance computing capacities         | <input type="radio"/> | <input type="radio"/> | <input type="radio"/> |
| Lack of available resources                              | <input type="radio"/> | <input type="radio"/> | <input type="radio"/> |
| Lack of sufficient education                             | <input type="radio"/> | <input type="radio"/> | <input type="radio"/> |
| Lack of sufficient training                              | <input type="radio"/> | <input type="radio"/> | <input type="radio"/> |
| Lack of suitable modelling tools                         | <input type="radio"/> | <input type="radio"/> | <input type="radio"/> |
| Lack of alternative models and results to explore        | <input type="radio"/> | <input type="radio"/> | <input type="radio"/> |
| Missing parameters                                       | <input type="radio"/> | <input type="radio"/> | <input type="radio"/> |
| Missing parameters' uncertainty                          | <input type="radio"/> | <input type="radio"/> | <input type="radio"/> |
| Poor description of models' parameters                   | <input type="radio"/> | <input type="radio"/> | <input type="radio"/> |
| Difficulties to reproduce the results obtained by others | <input type="radio"/> | <input type="radio"/> | <input type="radio"/> |
| Other                                                    | <input type="radio"/> | <input type="radio"/> | <input type="radio"/> |

Other (please specify)

**69. Which are the major challenges you have faced (as a modeller/Systems biologist/applier/reviewer):**

|                                                           | None                  | Minor                 | Major                 |
|-----------------------------------------------------------|-----------------------|-----------------------|-----------------------|
| Limitations of the model                                  | <input type="radio"/> | <input type="radio"/> | <input type="radio"/> |
| Complex mathematical functions                            | <input type="radio"/> | <input type="radio"/> | <input type="radio"/> |
| Hard to understand the model's assumptions                | <input type="radio"/> | <input type="radio"/> | <input type="radio"/> |
| Hard to understand the estimation method                  | <input type="radio"/> | <input type="radio"/> | <input type="radio"/> |
| Hard to understand the ODE solvers and optimisers         | <input type="radio"/> | <input type="radio"/> | <input type="radio"/> |
| Unable to produce my own scripts                          | <input type="radio"/> | <input type="radio"/> | <input type="radio"/> |
| Difficulties in communicating the rationale of my methods | <input type="radio"/> | <input type="radio"/> | <input type="radio"/> |
| Lack of trained staff                                     | <input type="radio"/> | <input type="radio"/> | <input type="radio"/> |
| Other                                                     | <input type="radio"/> | <input type="radio"/> | <input type="radio"/> |

Other (please specify)

**70. How did you deal with those challenges: (multiple answers are possible)**

- I proceeded without fully understanding some concepts
- I ignored some of the model's assumptions
- I asked someone else to help me
- I took some training
- I developed a model with limitations which I further listed
- Other (please specify)

**71. Would you attend training in other M&S activities than you have used:**

- Yes
- No

**72. If Yes: which are these M&S activities:**

**73. Indicate the types of models/methods/other areas where training would assist you meeting those challenges:**

**74. Which are the areas of impact of M&S in your organisation/projects/collaborations:**

|                                                 | Never                 | Occasionally          | Frequently            |
|-------------------------------------------------|-----------------------|-----------------------|-----------------------|
| Understand drug characteristics                 | <input type="radio"/> | <input type="radio"/> | <input type="radio"/> |
| Understand disease characteristics              | <input type="radio"/> | <input type="radio"/> | <input type="radio"/> |
| Understand system characteristics               | <input type="radio"/> | <input type="radio"/> | <input type="radio"/> |
| Dose selection                                  | <input type="radio"/> | <input type="radio"/> | <input type="radio"/> |
| Decision making                                 | <input type="radio"/> | <input type="radio"/> | <input type="radio"/> |
| Methodological aspects                          | <input type="radio"/> | <input type="radio"/> | <input type="radio"/> |
| Approval of new drugs                           | <input type="radio"/> | <input type="radio"/> | <input type="radio"/> |
| New trial designs                               | <input type="radio"/> | <input type="radio"/> | <input type="radio"/> |
| (New) treatment adjustments for patients        | <input type="radio"/> | <input type="radio"/> | <input type="radio"/> |
| Hypothesis generation                           | <input type="radio"/> | <input type="radio"/> | <input type="radio"/> |
| Individualisation therapy/Personalised medicine | <input type="radio"/> | <input type="radio"/> | <input type="radio"/> |
| Translational modelling                         | <input type="radio"/> | <input type="radio"/> | <input type="radio"/> |
| Line extension modelling                        | <input type="radio"/> | <input type="radio"/> | <input type="radio"/> |
| Other                                           | <input type="radio"/> | <input type="radio"/> | <input type="radio"/> |

Other (please specify)

**75. What is the benefit of modelling & simulation activities in your organisation/projects/collaborations:**

**\*76. For training & education purposes are you willing to share published data:**

- Yes
- No

**\*77. For training & education purposes are you willing to share unpublished data:**

- Yes
- No

**\*78. For training & education purposes are you willing to share published models:**

Yes

No

**\*79. For training & education purposes are you willing to share unpublished models:**

Yes

No

**\*80. If you have answered YES to one of the above questions, under what conditions would you be willing to consider sharing data/models**

**\*81. Regarding M&S activities, do you collaborate with other stakeholders / organisations / partners (please include the three most important collaborations you have on a regular basis):**

Academic groups

Clinicians/Clinical Pharmacists

Pharmaceutical industry

CROs

Other non-profit research organisations

Regulatory agencies

Patient organisations

Other (please specify)

## Submit your results

On behalf of DDMoRe we would like to thank you for taking the time to complete this survey.

Please submit your input.
